# Supplementary material for: Improved diagnosis of SARS-CoV-2 by using Nucleoprotein and Spike protein fragment 2 in quantitative dual ELISA tests
Source: medRxiv preprint, doi:10.1101/2021.04.07.21255024, version 1 (2021-04-09)
Supplement: Fig S1 [file 255024_file09.docx]

**Improved diagnosis of SARS-CoV-2 by using Nucleoprotein and Spike protein fragment 2 in quantitative dual ELISA tests**

Carolina De M. Verissimo1*; Carol O’Brien2; Jesús López Corrales1; Amber Dorey1; Krystyna Cwiklinski1; Richard Lalor1; Jack M. Doyle2; Stephen Field3; Claire Masterson4; Eduardo Ribes Martinez4; Gerry Hughes5,6; Colm Bergin5,6; Kieran Walshe2; Bairbre McNicholas7; John G. Laffey4; John P. Dalton1; Colm Kerr5,6;Sean Doyle2

**SUPPLEMENTARY DATA**


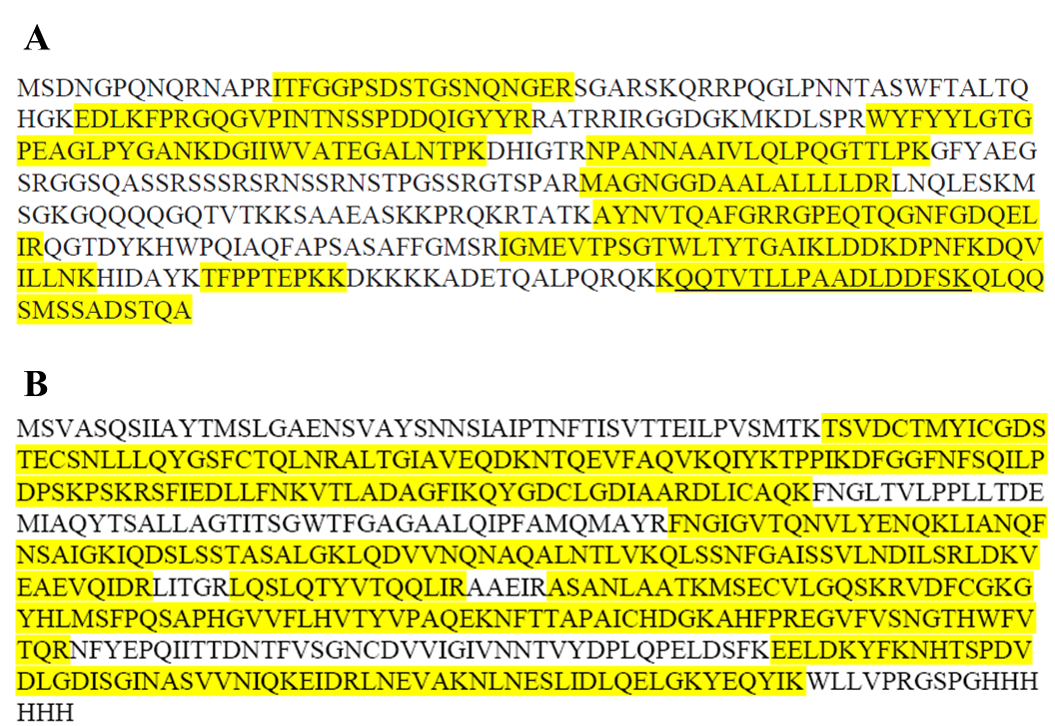


**Supplementary Figure S1.** Mass spectrometry analysis (MS/MS) to confirm the SARS-CoV-2 protein sequences recombinantly expressed. A: Nucleocapsid protein (Npro). B: Subunit 2 of Spike protein (S2Frag). The tryptic peptides that match the known sequence of amino acids for the SARS-CoV-2 identified by MS/MS are highlighted in yellow, and cover 53% and 68% of the Npro and S2Frag sequence, respectively.
